# Supplementary figures and images for: Co/Ni-MOF-74-derived CoNi2S4 nanoparticles embedded in porous carbon as a high performance anode material for sodium ion batteries
Source: Royal Society of Chemistry journal article supplement (doi:10.1039/d0nj02736g), 2020-01-01

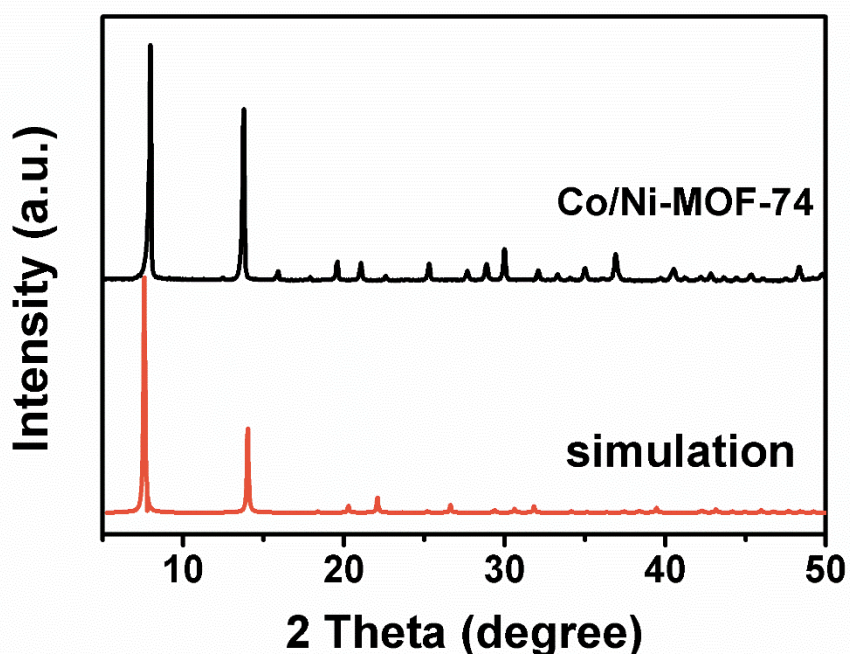

Fig. S1 XRD patterns of Co/Ni-MOF-74

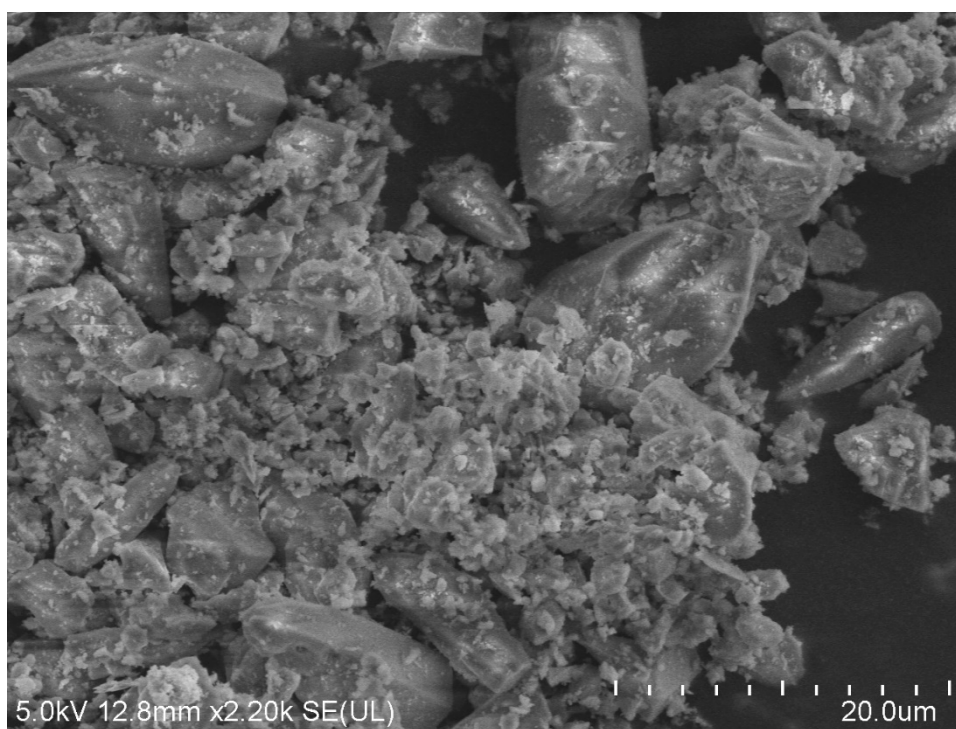

Fig. S2 SEM images of Co/Ni-MOF-74

Supplement: d0nj02736g1.pdf [file d0nj02736g1.pdf]
